# Supplementary material for: Effectiveness of human immunodeficiency virus prevention strategies by mapping the geographic dispersion pattern of human immunodeficiency virus prevalence in Nanning, China
Source: Springer Nature journal article supplement (doi:10.1186/s12889-024-18345-9), 2024-03-16
Supplement: MOESM1 [file 26868212]

# Additional file 1

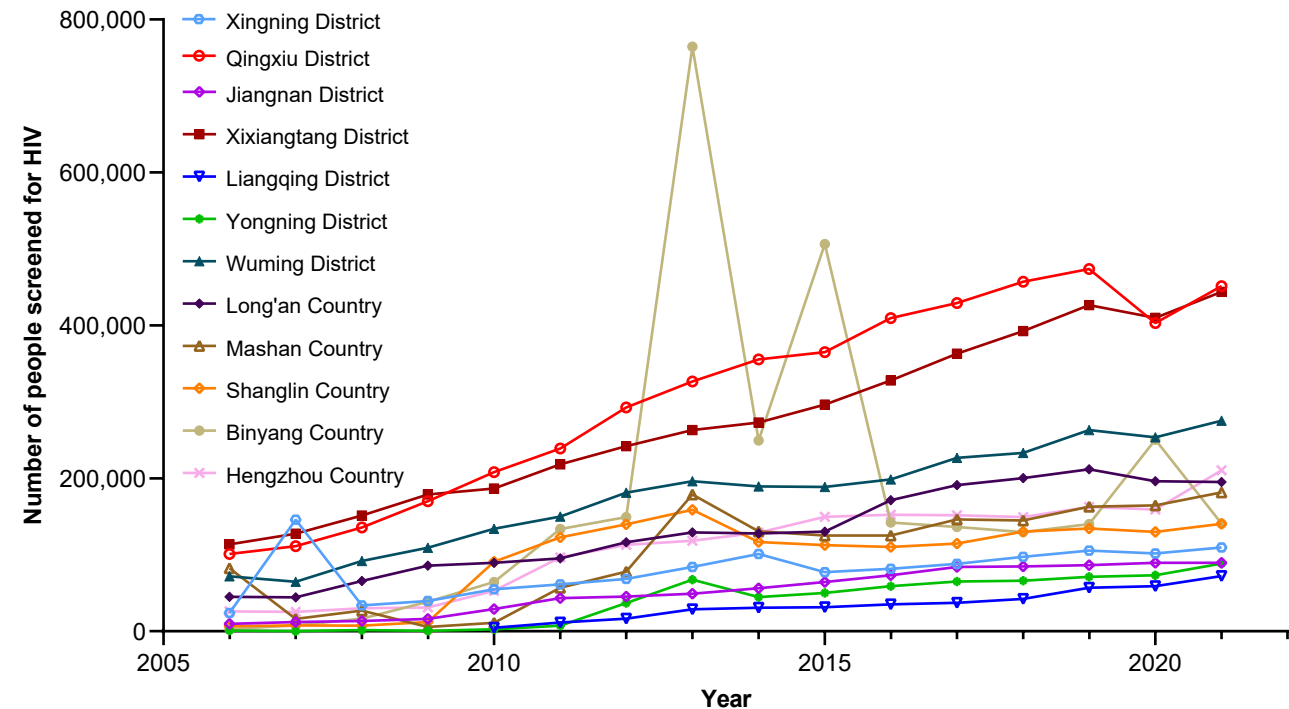

Figure S1. The annual number of people screened for human immunodeficiency virus (HIV) infection in counties and districts of Nanning City from 2006 to 2021.
