# Supplementary material for: Effectiveness of human immunodeficiency virus prevention strategies by mapping the geographic dispersion pattern of human immunodeficiency virus prevalence in Nanning, China
Source: Springer Nature journal article supplement (doi:10.1186/s12889-024-18345-9), 2024-03-16
Supplement: MOESM2 [file 26868212]

# Additional file 2

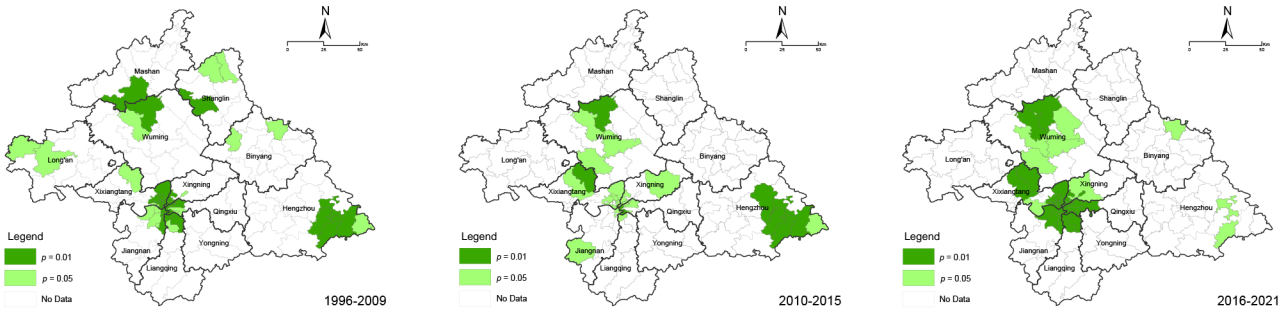

**Figure S2.** Significance test results of the local spatial autocorrelation of human immunodeficiency virus reported cases in Nanning, China, from 1996 to 2021.
